# Supplementary material for: Human giant congenital melanocytic nevus exhibits potential proteomic alterations leading to melanotumorigenesis
Source: PubMed Central journal article supplement (PMC3575290; doi:10.1186/1477-5956-10-50), 2012-08-20
Supplement: 1477-5956-10-50-S3.pdf [file 1477-5956-10-50-S3.pdf]

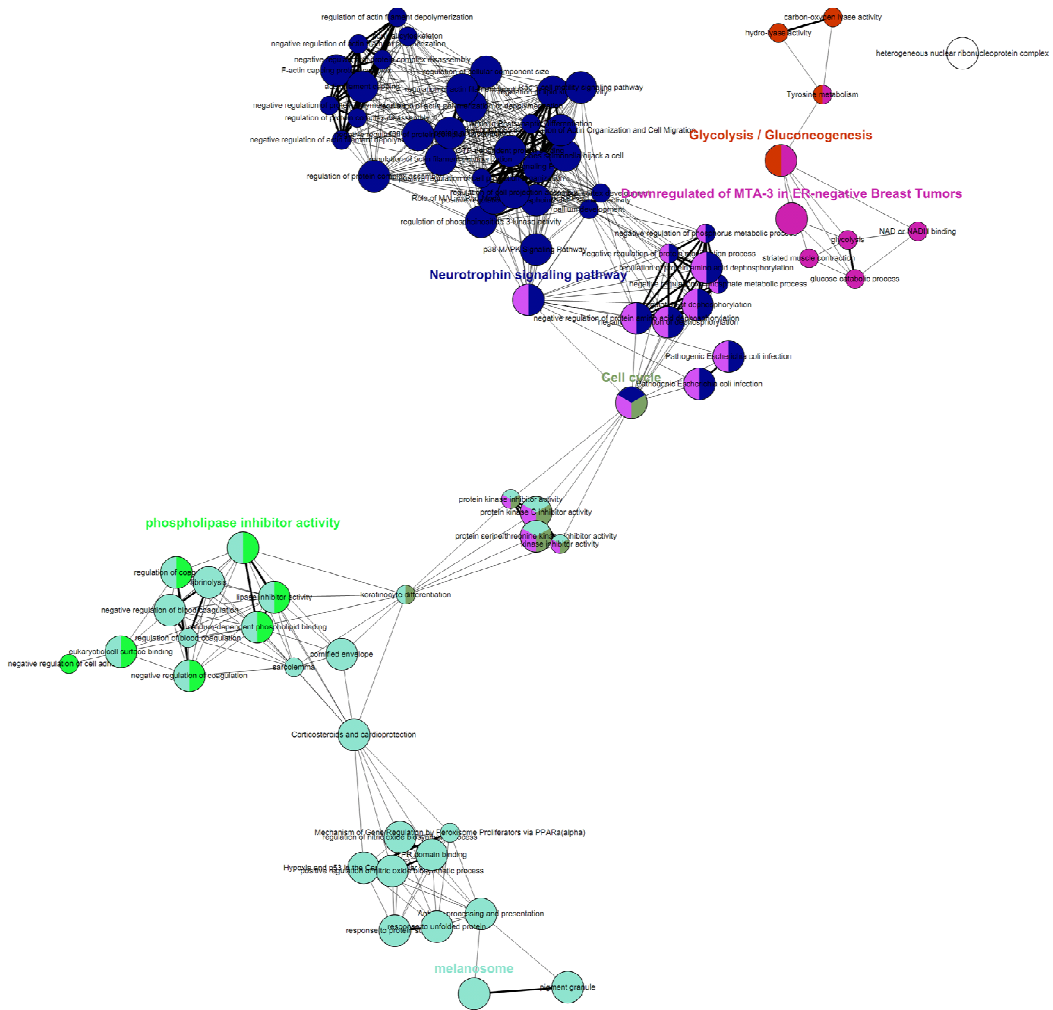

Figure S2. The functional network and enriched functional group of GCMN was analyzed using ClueGO, a biological term enrichment analyzer. The following proteins were significantly enriched in GCMN: melanosome (GO\_cellular component), neurotrophin signaling pathway (KEGG pathway), downregulated of MTA-3 in ER-negative breast tumors (Biocarta), cell cycle (KEGG pathway), phospholipase inhibitor activity (GO\_molecular function), and glycolysis/gluconeogenesis (KEGG pathway).
